# Supplementary material
Source: Research Square preprint supplement (doi:10.21203/rs.3.rs-10335356/v1)
Supplement: Supplementary file 1 [file 453f319022eb8dd4681d4344.docx]

| **Time Point** | **Event** | **Key Finding / Action** |
| --- | --- | --- |
| Pre-hospital | High-velocity rollover RTA | Front-seat passenger; direct EMS transport |
| ED Arrival (T=0) | Primary & secondary survey | GCS 14/15; haemodynamically stable; PERRLA; injuries identified |
| T=0 – 30 min | FAST, plain radiographs | FAST negative; CXR/pelvis/C-spine normal |
| T=30 – 90 min | CT head (non-contrast) | Small Right tentorial extra-axial haemorrhage; no midline shift |
| T=90 – 180 min | Pan-CT (whole body) | Left 1st–2nd rib Fracture; Right 1st rib Fracture; C7 spinous process Fracture |
| T=180 – 240 min | CT angiography head & neck | **KEY FINDING: absent left ICA; absent bony carotid canal (congenital agenesis)** |
| T=240 – 360 min | Cardiac evaluation | ECG, troponin, CK-MB, echo all normal |
| Day 1 | MDT review | Neurosurgery, orthopaedics, trauma surgery, vascular neurology |
| Day 2 (48 h) | Repeat CT head | Stable tentorial haemorrhage; no interval change |
| Days 1–7 | Inpatient management | Conservative; wound care; analgesia; respiratory physiotherapy and soft cervical collar support |
| Day 7 | Discharge | Stable; aspirin commenced; statin prescribed; written instructions issued |
| Week 6 post-discharge | Outpatient neurovascular review | First follow-up scheduled |
| Year 5 from the index | MRA surveillance | Planned de novo aneurysm screening [9] |
